# Supplementary material
Source: Springer Nature journal article supplement (https://www.springermedizin.de/resource/supplementary/12891_2014_2396_MOESM2_ESM.pdf/9510106)

Supplementary Figure 1. Validation of immune cell metagenes using independent data

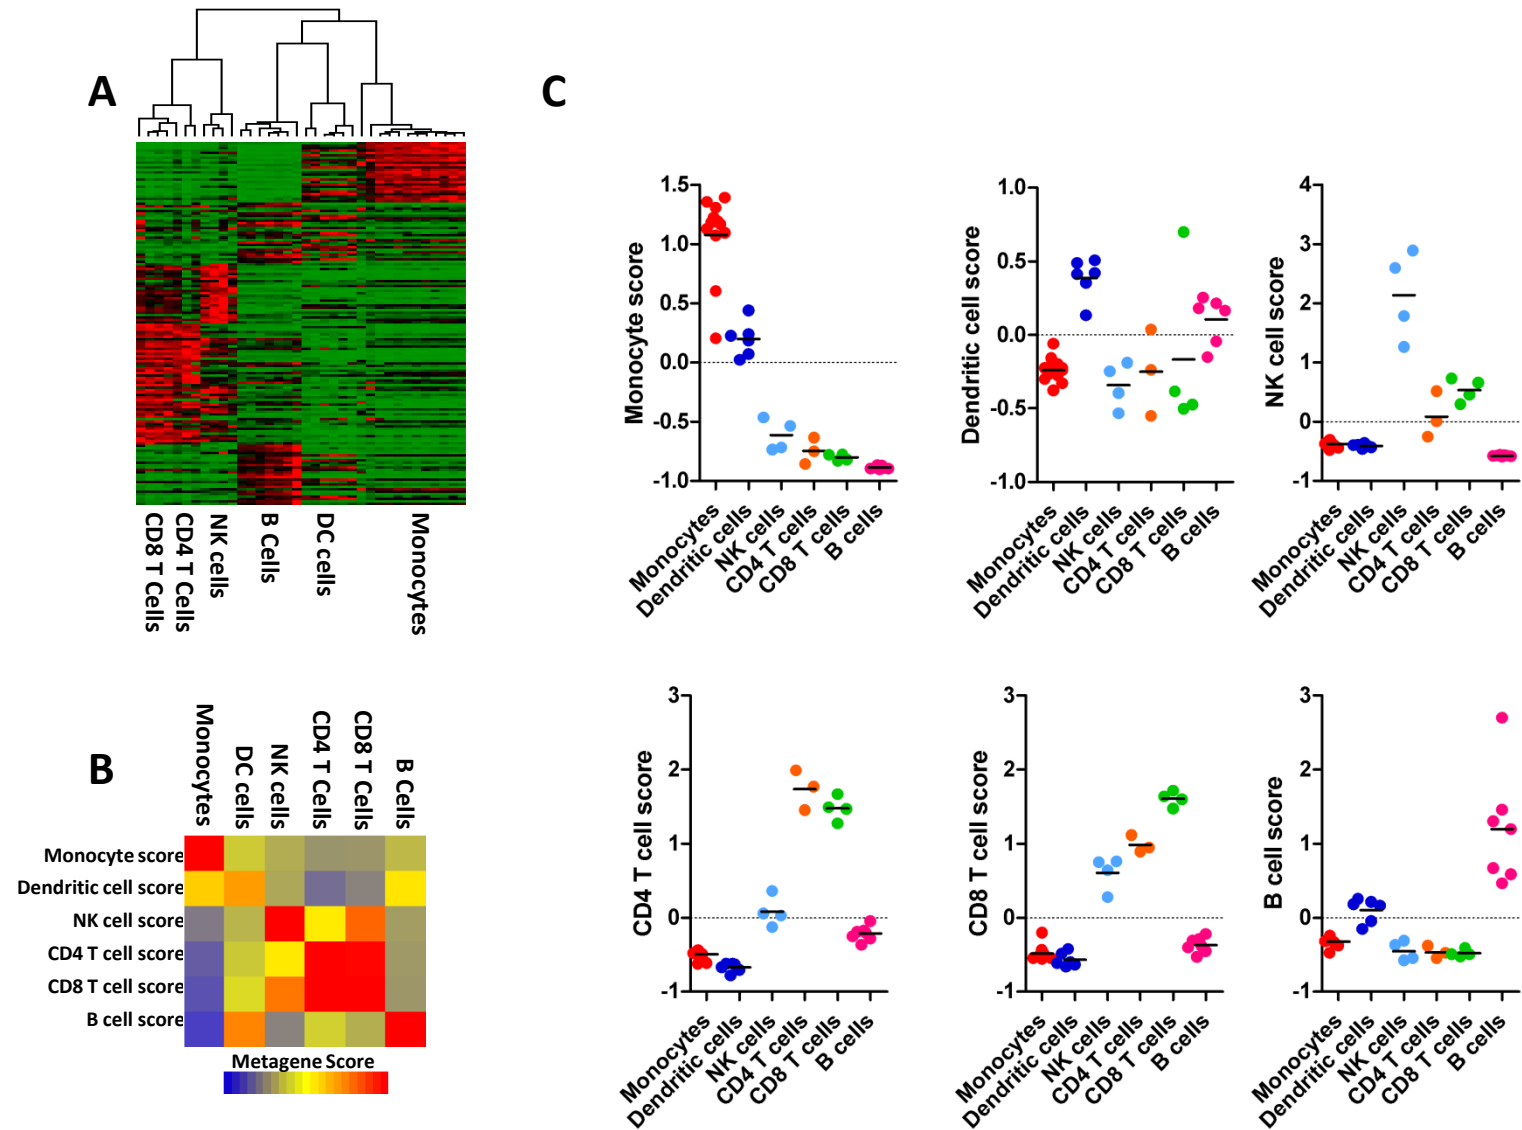

Supplement: MOESM2 [file 9510106]
